# Supplementary material for: Growth, ammonium metabolism, and photosynthetic properties of Ulva australis (Chlorophyta) under decreasing pH and ammonium enrichment
Source: PubMed Central journal article supplement (PMC5703455; doi:10.1371/journal.pone.0188389), 2017-11-27
Supplement: pone.0188389.s001.pdf [file pone.0188389.s001.pdf]

Supporting information for:

Growth, ammonium metabolism, and photosynthetic properties of *Ulva australis* (Chlorophyta) under decreasing pH and ammonium enrichment.

Reidenbach LB, Fernandez PA, Leal PP, Noisette F, McGraw CM, Revill AT, Hurd CL, Kübler JE

**S1 Table. Seawater carbonate chemistry estimates.** Measurements of total pH ( $\text{pH}_T$ ) and total alkalinity (AT) are described in the methods. AT was measured as  $2111.42 \pm 18.33$  (mean  $\pm$  SEM) ( $n = 7$ ). Salinity is assumed to be 35 ‰. Temperature is assumed to be  $16.5^\circ\text{C}$  (the average temperature throughout the experiment) MFC = mass flow controller. DIC = dissolved inorganic carbon.

| MFC | $\text{NH}_4^+$ treatment | Cycle | $\text{pH}_T$ | Salinity (‰) | Temperature ( $^\circ\text{C}$ ) | $\text{pCO}_2$ ( $\mu\text{atm}$ ) | $\text{HCO}_3^-$ ( $\mu\text{mol/kg}$ ) | $\text{CO}_3^{2-}$ ( $\mu\text{mol/kg}$ ) | DIC ( $\mu\text{mol/kg}$ ) | AT ( $\mu\text{mol/kg}$ ) |
|-----|---------------------------|-------|---------------|--------------|----------------------------------|------------------------------------|-----------------------------------------|-------------------------------------------|----------------------------|---------------------------|
| 1   | Ambient                   | light | 7.92          | 35           | 16.5                             | 513.62                             | 1812.52                                 | 118.64                                    | 1949.49                    | 2111.42                   |
| 1   | Ambient                   | light | 7.82          | 35           | 16.5                             | 666.02                             | 1866.92                                 | 97.06                                     | 1987.76                    | 2111.42                   |
| 1   | Ambient                   | light | 7.77          | 35           | 16.5                             | 756.82                             | 1890.75                                 | 87.61                                     | 2005.37                    | 2111.42                   |
| 1   | Ambient                   | light | 7.85          | 35           | 16.5                             | 616.45                             | 1851.57                                 | 103.15                                    | 1976.73                    | 2111.42                   |
| 1   | Enriched                  | light | 7.83          | 35           | 16.5                             | 649.10                             | 1861.90                                 | 99.06                                     | 1984.12                    | 2111.42                   |
| 1   | Enriched                  | light | 7.84          | 35           | 16.5                             | 632.58                             | 1856.78                                 | 101.09                                    | 1980.44                    | 2111.42                   |
| 1   | Enriched                  | light | 7.85          | 35           | 16.5                             | 616.45                             | 1851.57                                 | 103.15                                    | 1976.73                    | 2111.42                   |
| 1   | Enriched                  | light | 7.85          | 35           | 16.5                             | 616.45                             | 1851.57                                 | 103.15                                    | 1976.73                    | 2111.42                   |
| 2   | Ambient                   | light | 7.92          | 35           | 16.5                             | 513.62                             | 1812.52                                 | 118.64                                    | 1949.49                    | 2111.42                   |
| 2   | Ambient                   | light | 7.93          | 35           | 16.5                             | 500.28                             | 1806.56                                 | 121.00                                    | 1945.42                    | 2111.42                   |
| 2   | Ambient                   | light | 7.95          | 35           | 16.5                             | 474.53                             | 1794.34                                 | 125.85                                    | 1937.12                    | 2111.42                   |
| 2   | Ambient                   | light | 7.95          | 35           | 16.5                             | 474.53                             | 1794.34                                 | 125.85                                    | 1937.12                    | 2111.42                   |
| 2   | Enriched                  | light | 7.92          | 35           | 16.5                             | 513.62                             | 1812.52                                 | 118.64                                    | 1949.49                    | 2111.42                   |
| 2   | Enriched                  | light | 7.93          | 35           | 16.5                             | 500.28                             | 1806.56                                 | 121.00                                    | 1945.42                    | 2111.42                   |
| 2   | Enriched                  | light | 8.09          | 35           | 16.5                             | 325.16                             | 1697.25                                 | 164.32                                    | 1873.17                    | 2111.42                   |
| 2   | Enriched                  | light | 7.97          | 35           | 16.5                             | 449.98                             | 1781.72                                 | 130.85                                    | 1928.63                    | 2111.42                   |
| 3   | Ambient                   | light | 8.04          | 35           | 16.5                             | 372.80                             | 1734.29                                 | 149.64                                    | 1897.24                    | 2111.42                   |

| MFC | NH <sub>4</sub> <sup>+</sup> treatment | cycle | pH <sub>T</sub> | Salinity (‰) | Temperature (°C) | pCO <sub>2</sub> (µatm) | HCO <sub>3</sub> <sup>-</sup> (µmol/kg) | CO <sub>3</sub> <sup>2-</sup> (µmol/kg) | DIC (µmol/kg) | AT (µmol/kg) |
|-----|----------------------------------------|-------|-----------------|--------------|------------------|-------------------------|-----------------------------------------|-----------------------------------------|---------------|--------------|
| 3   | Ambient                                | light | 8.05            | 35           | 16.5             | 362.81                  | 1727.10                                 | 152.49                                  | 1892.54       | 2111.42      |
| 3   | Ambient                                | light | 7.97            | 35           | 16.5             | 449.98                  | 1781.72                                 | 130.85                                  | 1928.63       | 2111.42      |
| 3   | Ambient                                | light | 7.97            | 35           | 16.5             | 449.98                  | 1781.72                                 | 130.85                                  | 1928.63       | 2111.42      |
| 3   | Enriched                               | light | 8.06            | 35           | 16.5             | 353.05                  | 1719.80                                 | 155.39                                  | 1887.78       | 2111.42      |
| 3   | Enriched                               | light | 8.07            | 35           | 16.5             | 343.53                  | 1712.39                                 | 158.32                                  | 1882.97       | 2111.42      |
| 3   | Enriched                               | light | 7.99            | 35           | 16.5             | 426.59                  | 1768.68                                 | 136.01                                  | 1919.92       | 2111.42      |
| 3   | Enriched                               | light | 8.00            | 35           | 16.5             | 415.31                  | 1762.01                                 | 138.66                                  | 1915.50       | 2111.42      |
| 1   | Ambient                                | dark  | 7.69            | 35           | 16.5             | 926.19                  | 1924.61                                 | 74.18                                   | 2031.85       | 2111.42      |
| 1   | Ambient                                | dark  | 7.71            | 35           | 16.5             | 880.83                  | 1916.62                                 | 77.35                                   | 2025.41       | 2111.42      |
| 1   | Ambient                                | dark  | 7.62            | 35           | 16.5             | 1102.72                 | 1950.32                                 | 63.98                                   | 2053.66       | 2111.42      |
| 1   | Ambient                                | dark  | 7.69            | 35           | 16.5             | 926.19                  | 1924.61                                 | 74.18                                   | 2031.85       | 2111.42      |
| 1   | Enriched                               | dark  | 7.56            | 35           | 16.5             | 1278.69                 | 1969.73                                 | 56.28                                   | 2071.64       | 2111.42      |
| 1   | Enriched                               | dark  | 7.66            | 35           | 16.5             | 998.34                  | 1936.06                                 | 69.64                                   | 2041.33       | 2111.42      |
| 1   | Enriched                               | dark  | 7.65            | 35           | 16.5             | 1023.53                 | 1939.73                                 | 68.18                                   | 2044.44       | 2111.42      |
| 1   | Enriched                               | dark  | 7.66            | 35           | 16.5             | 998.34                  | 1936.06                                 | 69.64                                   | 2041.33       | 2111.42      |
| 2   | Ambient                                | dark  | 7.75            | 35           | 16.5             | 796.24                  | 1899.69                                 | 84.07                                   | 2012.18       | 2111.42      |
| 2   | Ambient                                | dark  | 7.76            | 35           | 16.5             | 776.30                  | 1895.26                                 | 85.82                                   | 2008.79       | 2111.42      |
| 2   | Ambient                                | dark  | 7.75            | 35           | 16.5             | 796.24                  | 1899.69                                 | 84.07                                   | 2012.18       | 2111.42      |
| 2   | Ambient                                | dark  | 7.75            | 35           | 16.5             | 796.24                  | 1899.69                                 | 84.07                                   | 2012.18       | 2111.42      |
| 2   | Enriched                               | dark  | 7.68            | 35           | 16.5             | 949.68                  | 1928.50                                 | 72.64                                   | 2035.03       | 2111.42      |
| 2   | Enriched                               | dark  | 7.75            | 35           | 16.5             | 796.24                  | 1899.69                                 | 84.07                                   | 2012.18       | 2111.42      |
| 2   | Enriched                               | dark  | 7.68            | 35           | 16.5             | 949.68                  | 1928.50                                 | 72.64                                   | 2035.03       | 2111.42      |
| 2   | Enriched                               | dark  | 7.71            | 35           | 16.5             | 880.83                  | 1916.62                                 | 77.35                                   | 2025.41       | 2111.42      |
| 3   | Ambient                                | dark  | 7.8             | 35           | 16.5             | 701.06                  | 1876.71                                 | 93.18                                   | 1994.91       | 2111.42      |
| 3   | Ambient                                | dark  | 7.81            | 35           | 16.5             | 683.33                  | 1871.86                                 | 95.11                                   | 1991.35       | 2111.42      |
| 3   | Ambient                                | dark  | 7.84            | 35           | 16.5             | 632.58                  | 1856.78                                 | 101.09                                  | 1980.44       | 2111.42      |

| MFC | NH <sub>4</sub> <sup>+</sup> treatment | cycle | pH <sub>T</sub> | Salinity (‰) | Temperature (°C) | pCO <sub>2</sub> (µatm) | HCO <sub>3</sub> <sup>-</sup> (µmol/kg) | CO <sub>3</sub> <sup>2-</sup> (µmol/kg) | DIC (µmol/kg) | AT (µmol/kg) |
|-----|----------------------------------------|-------|-----------------|--------------|------------------|-------------------------|-----------------------------------------|-----------------------------------------|---------------|--------------|
| 3   | Ambient                                | dark  | 7.85            | 35           | 16.5             | 616.45                  | 1851.57                                 | 103.15                                  | 1976.73       | 2111.42      |
| 3   | Enriched                               | dark  | 7.79            | 35           | 16.5             | 719.21                  | 1881.48                                 | 91.29                                   | 1998.44       | 2111.42      |
| 3   | Enriched                               | dark  | 7.78            | 35           | 16.5             | 737.80                  | 1886.16                                 | 89.44                                   | 2001.92       | 2111.42      |
| 3   | Enriched                               | dark  | 7.82            | 35           | 16.5             | 666.02                  | 1866.92                                 | 97.06                                   | 1987.76       | 2111.42      |
| 3   | Enriched                               | dark  | 7.8             | 35           | 16.5             | 701.06                  | 1876.71                                 | 93.18                                   | 1994.91       | 2111.42      |
| 1   | Ambient                                | whole | 7.81            | 35           | 16.5             | 683.33                  | 1871.86                                 | 95.11                                   | 1991.35       | 2111.42      |
| 1   | Ambient                                | whole | 7.78            | 35           | 16.5             | 737.80                  | 1886.16                                 | 89.44                                   | 2001.92       | 2111.42      |
| 1   | Ambient                                | whole | 7.7             | 35           | 16.5             | 903.25                  | 1920.65                                 | 75.75                                   | 2028.64       | 2111.42      |
| 1   | Ambient                                | whole | 7.78            | 35           | 16.5             | 737.80                  | 1886.16                                 | 89.44                                   | 2001.92       | 2111.42      |
| 1   | Enriched                               | whole | 7.69            | 35           | 16.5             | 926.19                  | 1924.61                                 | 74.18                                   | 2031.85       | 2111.42      |
| 1   | Enriched                               | whole | 7.76            | 35           | 16.5             | 776.30                  | 1895.26                                 | 85.82                                   | 2008.79       | 2111.42      |
| 1   | Enriched                               | whole | 7.76            | 35           | 16.5             | 776.30                  | 1895.26                                 | 85.82                                   | 2008.79       | 2111.42      |
| 1   | Enriched                               | whole | 7.76            | 35           | 16.5             | 776.30                  | 1895.26                                 | 85.82                                   | 2008.79       | 2111.42      |
| 2   | Ambient                                | whole | 7.84            | 35           | 16.5             | 632.58                  | 1856.78                                 | 101.09                                  | 1980.44       | 2111.42      |
| 2   | Ambient                                | whole | 7.85            | 35           | 16.5             | 616.45                  | 1851.57                                 | 103.15                                  | 1976.73       | 2111.42      |
| 2   | Ambient                                | whole | 7.86            | 35           | 16.5             | 600.70                  | 1846.28                                 | 105.25                                  | 1972.97       | 2111.42      |
| 2   | Ambient                                | whole | 7.86            | 35           | 16.5             | 600.70                  | 1846.28                                 | 105.25                                  | 1972.97       | 2111.42      |
| 2   | Enriched                               | whole | 7.81            | 35           | 16.5             | 683.33                  | 1871.86                                 | 95.11                                   | 1991.35       | 2111.42      |
| 2   | Enriched                               | whole | 7.85            | 35           | 16.5             | 616.45                  | 1851.57                                 | 103.15                                  | 1976.73       | 2111.42      |
| 2   | Enriched                               | whole | 7.88            | 35           | 16.5             | 570.28                  | 1835.41                                 | 109.56                                  | 1965.32       | 2111.42      |
| 2   | Enriched                               | whole | 7.85            | 35           | 16.5             | 616.45                  | 1851.57                                 | 103.15                                  | 1976.73       | 2111.42      |
| 3   | Ambient                                | whole | 7.92            | 35           | 16.5             | 513.62                  | 1812.52                                 | 118.64                                  | 1949.49       | 2111.42      |
| 3   | Ambient                                | whole | 7.93            | 35           | 16.5             | 500.28                  | 1806.56                                 | 121.00                                  | 1945.42       | 2111.42      |
| 3   | Ambient                                | whole | 7.92            | 35           | 16.5             | 513.62                  | 1812.52                                 | 118.64                                  | 1949.49       | 2111.42      |
| 3   | Ambient                                | whole | 7.92            | 35           | 16.5             | 513.62                  | 1812.52                                 | 118.64                                  | 1949.49       | 2111.42      |
| 3   | Enriched                               | whole | 7.93            | 35           | 16.5             | 500.28                  | 1806.56                                 | 121.00                                  | 1945.42       | 2111.42      |

| <b>MFC</b> | <b>NH<sub>4</sub><sup>+</sup> treatment</b> | <b>cycle</b> | <b>pH<sub>T</sub></b> | <b>Salinity (‰)</b> | <b>Temperature (°C)</b> | <b>pCO<sub>2</sub> (µatm)</b> | <b>HCO<sub>3</sub><sup>-</sup> (µmol/kg)</b> | <b>CO<sub>3</sub><sup>2-</sup> (µmol/kg)</b> | <b>DIC (µmol/kg)</b> | <b>AT (µmol/kg)</b> |
|------------|---------------------------------------------|--------------|-----------------------|---------------------|-------------------------|-------------------------------|----------------------------------------------|----------------------------------------------|----------------------|---------------------|
| 3          | Enriched                                    | whole        | 7.94                  | 35                  | 16.5                    | 487.25                        | 1800.50                                      | 123.40                                       | 1941.29              | 2111.42             |
| 3          | Enriched                                    | whole        | 7.92                  | 35                  | 16.5                    | 513.62                        | 1812.52                                      | 118.64                                       | 1949.49              | 2111.42             |
| 3          | Enriched                                    | whole        | 7.91                  | 35                  | 16.5                    | 527.28                        | 1818.39                                      | 116.31                                       | 1953.52              | 2111.42             |
